# Supplementary material
Source: Research Square preprint supplement (doi:10.21203/rs.3.rs-7255076/v1)
Supplement: Supplementary file 1 [file ee400ef2d64258fcfc26129a.docx]

Supplementary Table 1: Research Resource Identifiers (RRID) and other details of the antibodies used in the study:

| S. No. | Name (target) | RRID citation | Species raised in | Concentration used | Link to website |
| --- | --- | --- | --- | --- | --- |
| 1 | Anti-Aquaporin (Aquaporin 4) | Abcam Cat# ab46182, RRID:AB_955676 | Rabbit | 1:100 (Immunocyto-chemistry and flow cytometry) | https://www.abcam.com/aquaporin-4-antibody-ab46182.html |
| 2 | Anti-GM3 (GM3) | Tokyo Chemical Industry Cat# A2582, RRID:AB_3105836 | Mouse | 1:100 (Immunocyto-chemistry and Flow cytometry) | https://www.tcichemicals.com/IN/en/p/A2582 |
| 3 | Anti-Caveolin1 (Caveolin1) | ABclonal Cat# A22417, RRID:AB_3105837 | Rabbit | 1:100 (Immunocyto-chemistry and Flow cytometry) | https://www.abclonal.com/catalog-antibodies/Caveolin1RabbitmAb/A22417 |
| 4 | Anti-LRRK2 (phospho S935)  [LRRK2 (phospho S935)] | Abcam Cat# ab133450, RRID:AB_2732035 | Rabbit | 1:100 (Immunocyto-chemistry and Flow cytometry) | https://www.abcam.com/en-us/products/primary-antibodies/lrrk2-phospho-s935-antibody-udd2-1012-ab133450 |
| 5 | Anti-LRRK2 (phospho S1292) antibody  [LRRK2 (phospho S1292)] | Abcam Cat# ab203181, RRID:AB_2921223 | Rabbit | 1:100 (Immunocyto-chemistry and Flow cytometry) | https://www.abcam.com/en-us/products/primary-antibodies/lrrk2-phospho-s1292-antibody-mjfr-19-7-8-ab203181 |
| 6 | Anti- LRRK2  [LRRK2] | Cloud-Clone Corp Cat# PAH716Hu01, RRID:AB_2935837 | Rabbit | 1:100 (Immunocyto-chemistry and Flow cytometry) | https://www.cloud-clone.com/products/PAH716Hu01.html |
| 7 | Anti-RAB8A (phospho T72)  [RAB8A(phospho T72)] | Abcam Cat# ab230260, RRID:AB_2814988 | Rabbit | 1:100 (Immunocyto-chemistry) | https://www.abcam.com/en-us/products/primary-antibodies/rab8a-phospho-t72-antibody-mjf-r20-ab230260 |
| 8 | Anti-RAB8A  (RAB8A) | ABclonal Cat# A17369, RRID:AB_2771919 | Rabbit | 1:100 (Immunocyto-chemistry and Flow cytometry) | https://www.abclonal.com/catalog-antibodies/RAB8ARabbitpAb/A17369 |
| 9 | Anti-RAB10 (phospho T73)  [RAB10 (phospho T73)] | Abcam Cat# ab241060, RRID:AB_2884876 | Rabbit | 1:100 (Immunocyto-chemistry and Flow cytometry) | https://www.abcam.com/en-us/products/primary-antibodies/rab10-phospho-t73-antibody-mjf-r21-22-5-ab241060 |
| 10 | Anti-RAB10  (RAB10) | ABclonal Cat# A22746, RRID:AB_3086620 | Rabbit | 1:100 (Immunocyto-chemistry and Flow cytometry) | https://www.abclonal.com/catalog-antibodies/KDValidatedRAB10RabbitmAb/A22746 |
| 11 | Anti- Complement Component 3 (C3) | Cloud-Clone Corp Cat# PAA861Hu01, RRID:AB_3105838 | Rabbit | 1:100 (Flow cytometry) | https://www.cloud-clone.com/products/PAA861Hu01.html |
| 12 | Anti- S100 Calcium Binding Protein A10 (S100A10) | Cloud-Clone Corp Cat# PAC046Bo01, RRID:AB_3105839 | Rabbit | 1:100 (Flow cytometry) | https://www.cloud-clone.com/products/PAC046Bo01.html |
| 13 | Anti- Phospho-alpha Synuclein (Ser129)  [p-Synuclein] | Thermo Fisher Scientific Cat# PA5-77815, RRID:AB_2736285 | Rabbit | 1:100 (Immunocyto-chemistry and flow cytometry) | https://www.thermofisher.com/antibody/product/Phospho-alpha-Synuclein-Ser129-Antibody-Polyclonal/PA5-77815 |
| 14 | Anti- Nitrated-alpha Synuclein (Tyr125, Tyr133)  [n-Synuclein] | Thermo Fisher Scientific Cat# MA5-16142, RRID:AB_11151957 | Mouse | 1:100 (Immunocyto-chemistry and flow cytometry) | https://www.thermofisher.com/antibody/product/Nitrated-alpha-Synuclein-Tyr125-Tyr133-Antibody-clone-24-8-Monoclonal/MA5-16142 |
| 15 | Anti-GFAP  [GFAP] | Cloud-Clone Corp Cat# MAA068Mu21, RRID:AB_3105840 | Mouse | 1:100 (Immunocyto-chemistry and flow cytometry) | https://www.cloud-clone.com/products/MAA068Mu21.html |
| 16 | Anti-GFAP  [GFAP] | Thermo Fisher Scientific Cat# PA5-16291, RRID:AB_10980769 | Rabbit | 1:100 (Immunocyto-chemistry and flow cytometry) | https://www.thermofisher.com/antibody/product/GFAP-Antibody-Polyclonal/PA5-16291 |
| 17 | Anti-Myxovirus Resistance 1 (MX1) | (Cloud-Clone Corp Cat# PAL763Hu01, RRID:AB_3105842) | Rabbit | 1:100 (flow cytometry) | https://www.cloud-clone.com/products/PAL763Hu01.html |
| 18 | Anti- Complement Factor B (CFB) | (Cloud-Clone Corp Cat# PAL763Hu01, RRID:AB_3711472) | Rabbit | 1:100 (flow cytometry) | https://www.cloud-clone.com/products/PAC011Hu04.html |
| 19 | Anti- Integrin Alpha 6 (ITGa6)  [CD49f] | (Cloud-Clone Corp Cat# PAB285Mu01, RRID:AB_3105841) | Rabbit | 1:100 (Immunocyto-chemistry and flow cytometry) | https://www.cloud-clone.com/products/PAB285Mu01.html |
| 20 | Anti-S100β  (S100-A1) | (Abcam Cat# ab868, RRID:AB_306716) | Rabbit | 1:100 (Immunocyto-chemistry) | https://www.citeab.com/antibodies/767603-ab868-antis100-antibodyastrocyte-  marker |
| 21 | Secondary antibody tagged with Alexa Fluor® 488 (IgG H&L) | Abcam Cat# ab150113, RRID:AB_2576208  Abcam Cat# ab150077, RRID:AB_2630356 | Goat against mouse  Goat against rabbit | 1:200 (Immunocyto-chemistry and flow cytometry) | https://www.abcam.com/goat-mouse-igg-hl-alexa-fluor-488-ab150113.html  abcam.com/goat-rabbit-igg-hl-alexa-fluor-488-ab150077.html |
| 22 | Secondary antibody tagged with Alexa Fluor® 647 (IgG H&L) | Abcam Cat# ab150115, RRID:AB_2687948  Abcam Cat# ab150075, RRID:AB_2752244 | Goat against mouse  Donkey against rabbit | 1:200 (Immunocyto-chemistry and flow cytometry) | https://www.abcam.com/goat-mouse-igg-hl-alexa-fluor-647-ab150115.html  https://www.abcam.com/donkey-rabbit-igg-hl-alexa-fluor-647-ab150075.html |
| 23 | Secondary antibody tagged with Alexa Fluor® 647 (IgG H&L) | Thermo Fisher Scientific Cat# A16101, RRID:AB_2534775  Thermo Fisher Scientific Cat# A16016, RRID:AB_2534690 | Goat against Rabbit  Donkey Against Mouse | 1:200 (Immunocyto-chemistry and flow cytometry) | https://www.thermothermo.com/antibody/product/Goat-anti-Rabbit-IgG-H-L-Secondary-Antibody-Polyclonal/A16101  https://www.thermofisher.com/antibody/product/Donkey-anti-Mouse-IgG-H-L-Secondary-Antibody-Polyclonal/A16016 |
